# Supplementary material
Source: PubMed Central journal article supplement (PMC8082293)
Supplement: ryai200103suppa1.pdf [file ryai200103suppa1.pdf]

©RSNA, 2021  
10.1148/ryai.2021200103

## **Appendix E1**

Website: <https://medphys.royalsurrey.nhs.uk/omidb/>

An open-source Python application programming interface and command-line tool has been developed to facilitate and promote scientific research with OMI-DB. Project documentation can be found at <https://scicomcore.bitbucket.io/omidb>.
